# Supplementary material
Source: PubMed Central journal article supplement (PMC4406853)
Supplement: NIHMS672058-supplement-1.pdf [file NIHMS672058-supplement-1.pdf]

Table 1: Probes used in this study

| <b>gene</b>       | <b>assay ID</b> |
|-------------------|-----------------|
| <i>Zbtb16</i>     | Mm01176868_m1   |
| <i>Il4</i>        | Mm00445259_m1   |
| <i>Il15</i>       | Mm00434210_m1   |
| <i>Ifng</i>       | Mm01168133_g1   |
| <i>Il15ra</i>     | Mm00500457_m1   |
| <i>Vdr</i>        | Mm00437297_m1   |
| <i>Rara</i>       | Mm01296312_m1   |
| <i>Rarg</i>       | Mm00441091_m1   |
| <i>Cyp27b1</i>    | Mm01165918_g1   |
| <i>Aldh1a2</i>    | Mm00501306_m1   |
| <i>Lin28</i>      | Mm00524077_m1   |
| <i>Rxra</i>       | Mm01332431_m1   |
| <i>Rxrb</i>       | Mm00436411_m1   |
| <i>Aire</i>       | Mm00477461_m1   |
| <i>beta5t</i>     | Mm00613641_s1   |
| <i>Rpl13a</i>     | Mm01612986_m1   |
| <i>hsa-let-7a</i> | 377             |
| <i>hsa-let-7b</i> | 2619            |
| <i>hsa-let-7c</i> | 379             |
| <i>hsa-let-7d</i> | 2283            |
| <i>hsa-let-7e</i> | 2406            |
| <i>hsa-let-7f</i> | 382             |
| <i>hsa-let-7g</i> | 2882            |
| <i>hsa-let-7i</i> | 2221            |
| <i>hsa-miR-98</i> | 577             |
| <i>U6</i>         | 1973            |
